# Supplementary material for: Time until treatment initiation is associated with catheter survival in peritoneal dialysis-related peritonitis
Source: Research Square preprint supplement (doi:10.21203/rs.3.rs-114700/v1), 2020-12-01
Supplement: Supplementary file 1 [file 0a89482e5e2d1db168ef6eab.pdf]

1 Time until treatment initiation is associated with catheter survival in peritoneal dialysis-related  
2 peritonitis

3

4 Rikako Oki<sup>1)</sup> †, Shiho Tsuji<sup>1)</sup> †, Yoshifumi Hamasaki<sup>1)\*</sup>, Yohei Komaru<sup>1)</sup>, Yoshihisa Miyamoto<sup>1)</sup>, Ryo  
5 Matsuura<sup>1)</sup>, Daisuke Yamada<sup>1)</sup>, Kent Doi<sup>2)</sup>, Haruki Kume<sup>3)</sup>, Masaomi Nangaku<sup>1)</sup>

6 1) Department of Hemodialysis and Apheresis, The University of Tokyo Hospital

7 2) Department of Acute Medicine, The University of Tokyo Hospital

8 3) Department of Urology, The University of Tokyo Hospital

9 †: Rikako Oki and Shiho Tsuji contributed equally to this work.

10

11 **\* Address correspondence:**

12 Yoshifumi Hamasaki, MD, PhD

13 Department of Hemodialysis and Apheresis, The University of Tokyo Hospital

14 Postal address: 7-3-1 Hongo, Bunkyo-ku, Tokyo 113-8655, Japan

15 E-mail address: yhamasaki-tky@umin.ac.jp

16 Tel.: +81-3-3815-5411

17 FAX: +81-3-5800-8806

18

19

# Supplementary Table 1

## Comparison of causative microorganism between removal and non-removal groups

| microorganism<br>[n(%)]      | removal group<br>(N=22) | non-removal group<br>(N=87) | p   |
|------------------------------|-------------------------|-----------------------------|-----|
| <i>CNS</i>                   | 2 (9%)                  | 14 (16%)                    | .41 |
| <i>Streptococcus spp.</i>    | 1 (5%)                  | 16 (18%)                    | .10 |
| <i>Staphylococcus aureus</i> | 4 (18%)                 | 6 (7%)                      | .10 |
| Other gram-positive cocci    | 3 (14%)                 | 4 (5%)                      | .12 |
| Gram-negative bacilli*       | 2 (9%)                  | 12 (14%)                    | .56 |
| Other bacteria**             | 0 (0%)                  | 3 (3%)                      | .38 |
| No growth                    | 10 (45%)                | 32 (37%)                    | .46 |

\*: except for *P. aeruginosa* and *Serratia spp.*

\*\* : Corynebacterium, Gram-positive bacilli

# Supplementary Table 2

## Comparison of causative microorganism between groups of ST time more or less than 24 hr

| microorganism [n(%)]         | ST time<24 hr<br>(N=88) | ST time>=24 hr<br>(N=21) | p   |
|------------------------------|-------------------------|--------------------------|-----|
| <i>CNS</i>                   | 14 (16%)                | 2 (10%)                  | .46 |
| <i>Streptococcus spp.</i>    | 14 (16%)                | 3 (14%)                  | .85 |
| <i>Staphylococcus aureus</i> | 8 (9%)                  | 2 (10%)                  | .95 |
| Other gram-positive cocci    | 7 (8%)                  | 0 (0%)                   | .18 |
| Gram-negative bacilli*       | 10 (11%)                | 4 (19%)                  | .34 |
| Other bacteria**             | 2 (2%)                  | 1 (5%)                   | .53 |
| Culture negative peritonitis | 33 (38%)                | 9 (43%)                  | .65 |

\*: except for *P. aeruginosa* and *Serratia spp.*

\*\* : Corynebacterium, Gram-positive bacilli
